# Supplementary material for: Rapid determination of the pesticide ametryn based on a colorimetric aptasensor of gold nanoparticles
Source: Royal Society of Chemistry journal article supplement (doi:10.1039/d0ay00283f), 2020-01-01
Supplement: d0ay00283f1.pdf [file d0ay00283f1.pdf]

## Supporting Information

### **Rapid determination of the pesticide ametryn based on a colorimetric aptasensor of gold nanoparticles**

Yuan Qu<sup>1</sup>, Heng Qian<sup>1</sup>, Yiduo Mi<sup>1</sup>, Jingjing He<sup>1</sup>, Haixiang Gao<sup>1</sup>, Runhua Lu<sup>1</sup>, Sanbing Zhang<sup>1</sup>,  
Wenfeng Zhou<sup>1,\*</sup>

1 Department of Applied Chemistry, China Agricultural University, Yuanmingyuan West Road 2#,  
Haidian District, Beijing 100193, China

### **Corresponding authors**

\* E-mail addresses: Wenfeng Zhou [wind1115@163.com](mailto:wind1115@163.com)

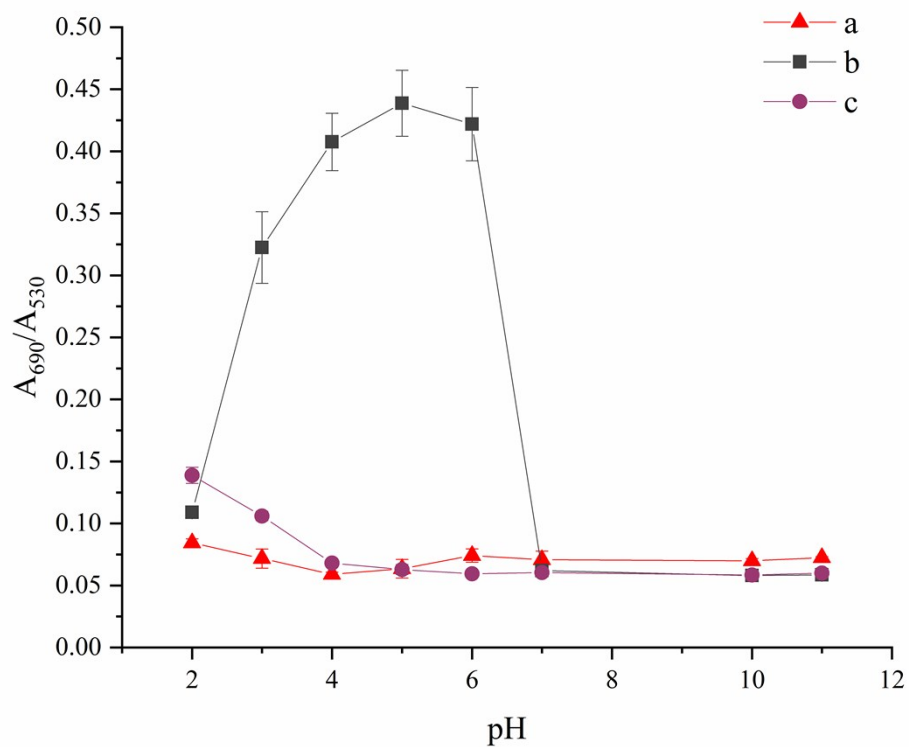

**Fig. S1.** Dependence of the pH on the absorption ratio ( $A_{690}/A_{530}$ ) of AuNPs in the (a) absence and (b) presence of  $1.0 \mu\text{g}\cdot\text{L}^{-1}$  (c) presence of  $0.1 \mu\text{g}\cdot\text{L}^{-1}$  ametryn. Error bars represent the standard deviation (n = 3).

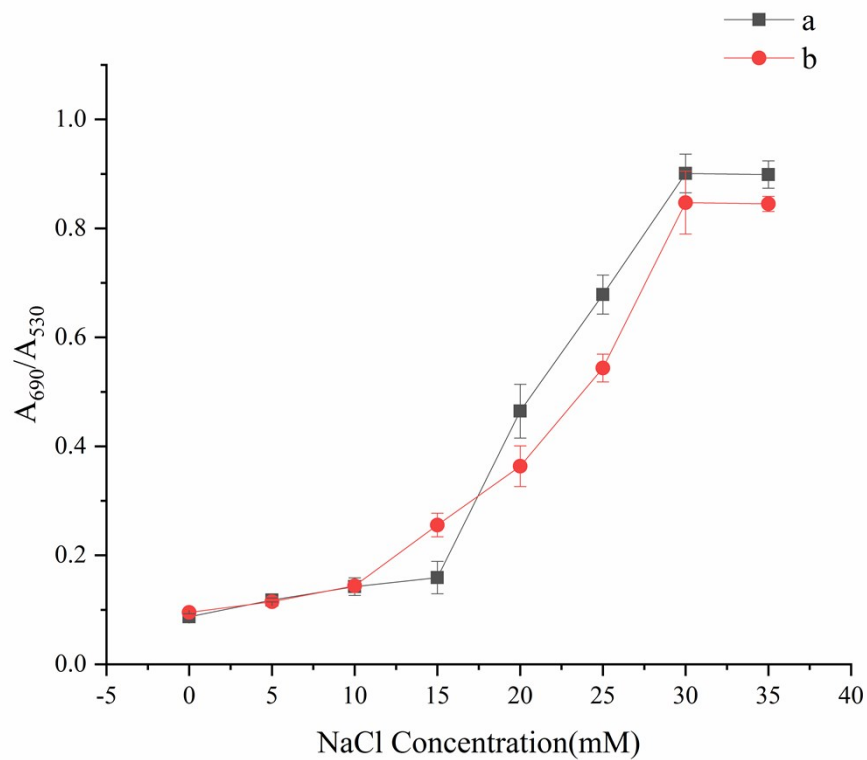

**Fig. S2.** Effect of NaCl concentrations on the absorption ratio ( $A_{690}/A_{530}$ ) of AuNPs in the (a) absence and (b) presence of  $0.1 \mu\text{g}\cdot\text{L}^{-1}$  ametryn. Error bars represent the standard deviation ( $n = 3$ ).

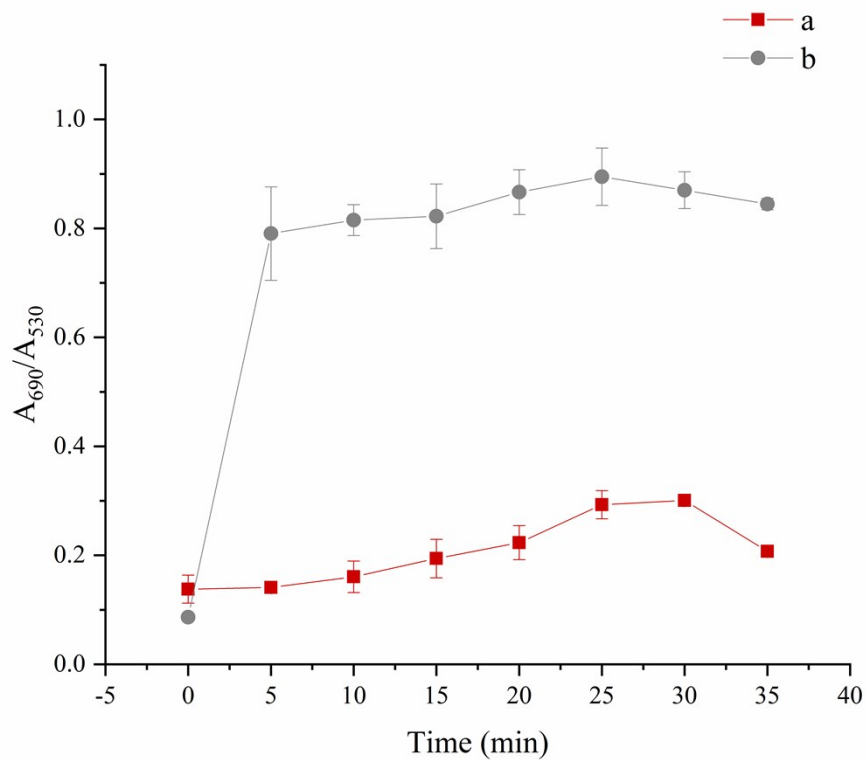

**Fig. S3.** Influence of incubation time (after addition of NaCl, HCl and ametryn into the AuNP-based sensor) on the absorption ratio ( $A_{690}/A_{530}$ ) of AuNPs in the presence of (a)  $0.2 \mu\text{g}\cdot\text{L}^{-1}$  and (b)  $0.4 \mu\text{g}\cdot\text{L}^{-1}$  ametryn. Error bars represent the standard deviation ( $n = 3$ ).

**Table S1.** Zeta Potential of the AuNP-based aptasensor at different conditions (Mean  $\pm$  SD, n = 3).

| Samples                | AuNP-based sensor | AuNP-based sensor + HCl (pH=4)<br>+ NaCl (5 mM) | AuNP-based sensor + HCl (pH=4) +<br>NaCl (5 mM) + Ametryn (4.4 $\mu$ M) |
|------------------------|-------------------|-------------------------------------------------|-------------------------------------------------------------------------|
| Zeta Potential<br>(mV) | -46.8 $\pm$ 2.2   | -40.2 $\pm$ 2.3                                 | -17.2 $\pm$ 0.3                                                         |

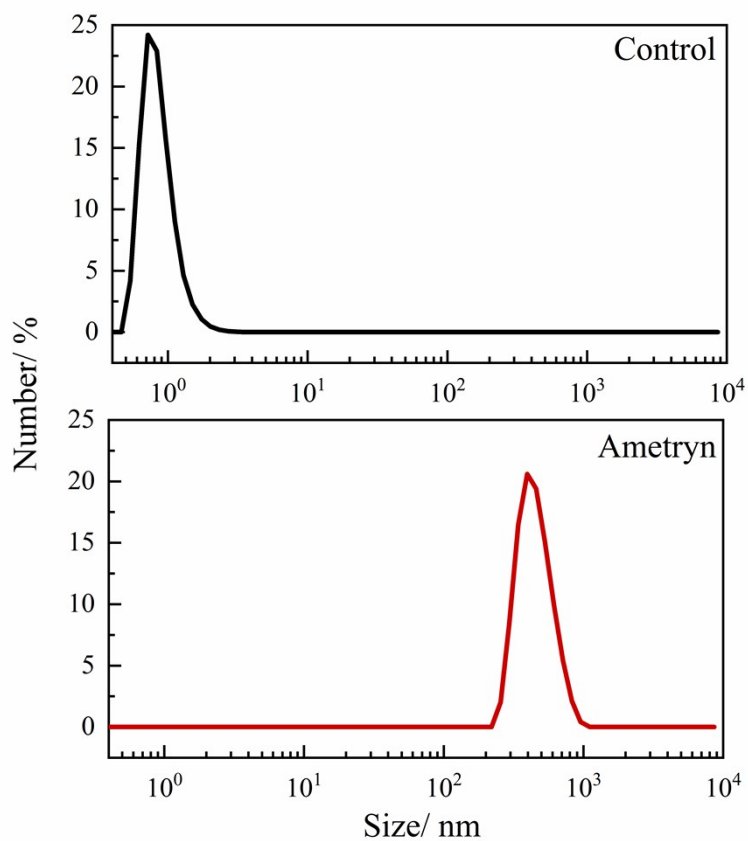

**Fig. S4.** Size distributions of the citrate-stabilized AuNPs at different conditions determined by DLS. Control: AuNPs (4.4 mL,  $C_{Au} = 0.45$  mM) incubated (5 min) with 10  $\mu$ L of HCl (pH=4) plus 50  $\mu$ L of NaCl (5 mM); Ametryn: AuNPs (4.4 mL,  $C_{Au} = 0.45$  mM) incubated (5 min) with 10  $\mu$ L of HCl (pH=4), 50  $\mu$ L of NaCl (5 mM) plus 100  $\mu$ L of Ametryn (4.4  $\mu$ M).
